# Supplementary material for: Crystallographic Features of Selected New α-Hydroxyphosphonates
Source: Research Square preprint supplement (doi:10.21203/rs.3.rs-8148510/v1), 2025-12-01
Supplement: Supplementary file 1 [file 7fa67109f893af0bca40b53c.docx]

**Electronic supplementary materials**

**Crystallographic Features of Selected New α-Hydroxyphosphonates**Andrey Sedov*a**, Kamil Ivshin*b*, Rustam Davletshin*a*, Natal’ya Davletshina*a*,
Khakimzyanova Alisa*a* and Polina Kuryntseva*c*

*aA.M. Butlerov Institute of Chemistry, Kazan Federal University, 420008, Kazan, Russia*

*bA.E. Arbuzov Institute of Organic and Physical Chemistry, Federal Research Center "Kazan Scientific Center of Russian Academy of Sciences", 420088, Kazan, Russia*

*cInstitute of Environmental Science* *and Biotechnology, Kazan Federal University, 420008, Kazan, Russia*

*E-mail:* [sedandrey1998@gmail.com](mailto:sedandrey1998@gmail.com)

**NMR spectra**

31Р{1H} NMR (CDCl3) of the O, O-Dipropyl [(hydroxy)(4-Chlorophenyl)methyl]phosphonate **1**

1H NMR (CDCl3) of the O, O-Dipropyl [(hydroxy)(4-Chlorophenyl)methyl]phosphonate **1**

13C{1H} NMR (CDCl3) of the O, O-Dipropyl [(hydroxy)(4-Chlorophenyl)methyl]phosphonate **1**

FTIRspectra of the O, O-Dipropyl [(hydroxy)(4-Chlorophenyl)methyl]phosphonate **1**

31Р{1H} NMR (CDCl3) of the O, O-Dipropyl [(hydroxy)(4-Bromophenyl)methyl]phosphonate **2**

1H NMR (CDCl3) of the O, O-Dipropyl [(hydroxy)(4-Bromophenyl)methyl]phosphonate **2**

13C{1H} NMR (CDCl3) of the O, O-Dipropyl [(hydroxy)(4-Bromophenyl)methyl]phosphonate **2**

FTIRspectra of the O, O-Dipropyl [(hydroxy)(4-Bromophenyl)methyl]phosphonate **2**

31Р{1H} NMR (CDCl3) of the O,O-Dipropyl[(hydroxy)(4-Methoxyphenyl)methyl]phosphonate **3**

1H NMR (CDCl3) of the O,O-Dipropyl[(hydroxy)(4-Methoxyphenyl)methyl]phosphonate **3**

13C{1H} (CDCl3) of the O,O-Dipropyl[(hydroxy)(4-Methoxyphenyl)methyl]phosphonate **3**

FTIRspectra of the O,O-Dipropyl[(hydroxy)(4-Methoxyphenyl)methyl]phosphonate **3**

31Р{1H} NMR (CDCl3) of the O,O-Dipropyl[(hydroxy)(4-(Dimethylamino)phenyl)methyl]phosphonate **4**

1H NMR (CDCl3) of the O,O-Dipropyl[(hydroxy)(4-(Dimethylamino)phenyl)methyl]phosphonate **4**

13C{1H} (CDCl3) of the O,O-Dipropyl[(hydroxy)(4-(Dimethylamino)phenyl)methyl]phosphonate **4**

FTIRspectra of the O,O-Dipropyl[(hydroxy)(4-(Dimethylamino)phenyl)methyl]phosphonate **4**
